# Supplementary material for: Redox requirements for ubiquitin-like urmylation of Ahp1, a 2-Cys peroxiredoxin from yeast
Source: PubMed Central journal article supplement (PMC7016264; doi:10.1016/j.redox.2020.101438), 2020-01-22
Supplement: mmc1.pdf [file mmc1.pdf]

## **Supplemental Material**

### **Redox requirements for ubiquitin-like urmylation of Ahp1, a 2-Cys peroxiredoxin from yeast**

Cindy Brachmann<sup>a,§</sup>, Lars Kaduhr<sup>a,§</sup>, André Jüdes<sup>a,§</sup>, Keerthiraju Ethiraju Ravichandran<sup>b,c</sup>,  
James D. West<sup>d</sup>, Sebastian Glatt<sup>b</sup> and Raffael Schaffrath<sup>a,\*</sup>

<sup>a</sup> Universität Kassel, Institut für Biologie, Fachgebiet Mikrobiologie,  
Heinrich-Plett-Str. 40, 34132 Kassel, Germany

<sup>b</sup> Max Planck Research Group at the Malopolska Centre of Biotechnology,  
Jagiellonian University, 30-387 Krakow, Poland

<sup>c</sup> Postgraduate School of Molecular Medicine, 02-091 Warsaw, Poland

<sup>d</sup> Biochemistry & Molecular Biology Program, Departments of Biology and Chemistry,  
The College of Wooster, Wooster, OH, USA

§ These authors contributed equally to this study

\* corresponding author:

Prof. Dr. Raffael Schaffrath  
Phone: +49-561-804-4175  
FAX: +49-561-804-4337  
eMail: schaffrath@uni-kassel.de

## 1) Supplemental Figures

Fig. S1.

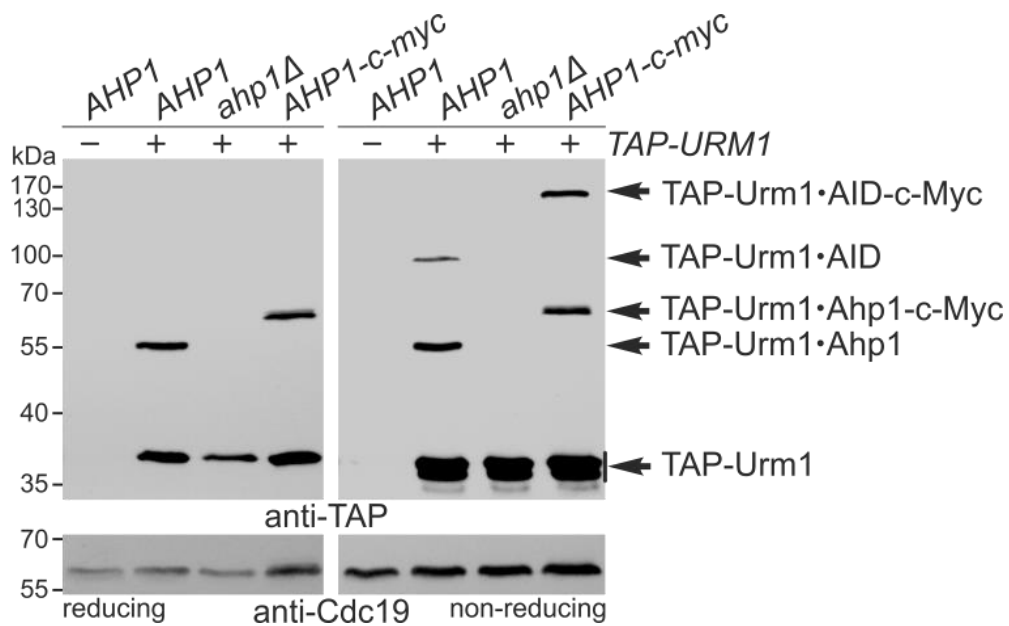

Supplemental Fig. S1. TAP-Urm1·Ahp1 conjugation *in vivo*. Shown are EMSAs under reducing (left panels) and non-reducing (right panels) conditions with protein extracts from indicated strains expressing *TAP-URM1* (+) or not (-). NEM-stabilized urmylation was studied with anti-TAP (top panels) diagnostic for free TAP-Urm1 (~37 kDa), urmylated Ahp1 (~55 kDa) and Ahp1 intersubunit disulfide (AID ~100 kDa) forms as well as Urm1-modified forms of c-Myc tagged Ahp1 (~65 kDa) and AIDs (~135 kDa). anti-Cdc19 blots (bottom panels) served as loading control. Reproduced in part from permission by Jüdes *et al.* (2016); *Microb Cell* 3: 554-564 (doi: 10.15698/mic2016.11.539).

Fig. S2.

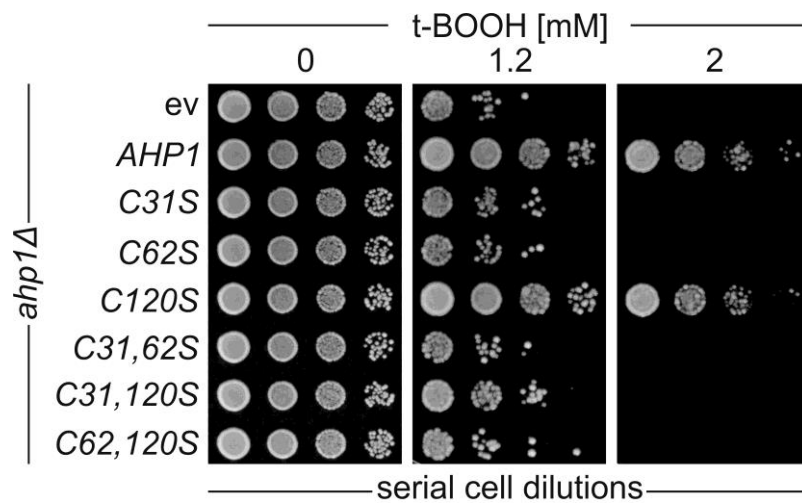

Supplemental Fig. S2. t-BOOH cytotoxicity assay *in vivo*. Using ten-fold serial cell dilutions, growth of an *ahp1Δ* yeast strain carrying empty vector (*ev*), wild-type peroxiredoxin (*AHP1*) gene or indicated Cys substitutions of Ahp1 (C31S; C62S; C120S; C31,62S; C31,120S; C62,120S) was monitored at 30°C in the presence of the denoted t-BOOH doses.

Fig. S3.

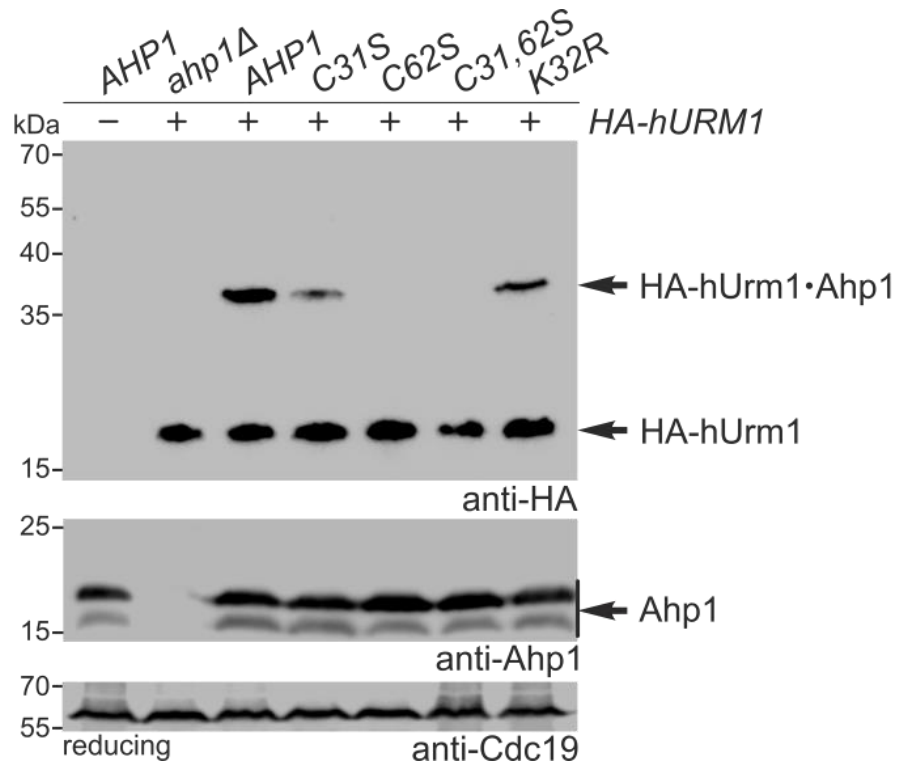

Supplemental Fig. S3. Ahp1 urmylation by the human homolog of yeast Urm1, hURM1, requires peroxidatic Cys-62. Shown are EMSA under reducing conditions from indicated strains expressing human HA-tagged hURM1 (+) or not (-). NEM-stabilized HA-hURM1 conjugation was studied by anti-HA blot (top panel) diagnostic for free HA-hURM1 and urmylated Ahp1 (~36 kDa). anti-Ahp1 (middle panel) detects unmodified Ahp1 (~19 kDa) and anti-Cdc19 (bottom panel) served as internal standard.

## 2) Supplemental Tables

**Supplemental Table S1. Yeast strains used in this study.**

| Strain | Genotype                                                 | Source     |
|--------|----------------------------------------------------------|------------|
| BY4741 | <i>MATa his3Δ1 leu2Δ0 met15Δ0 ura3Δ0</i>                 | Euroscarf  |
| Y01400 | BY4741, <i>urm1Δ::kanMX4</i>                             | Euroscarf  |
| Y02720 | BY4741, <i>ahp1Δ::kanMX4</i>                             | Euroscarf  |
| FEY14  | BY4741, <i>urm1Δ::kanMX4 AHP1-c-myc::ScHIS3</i>          | [20]       |
| FEY16  | BY4741, <i>ahp1Δ::kanMX4 urm1Δ::ScHIS3</i>               | [20]       |
| FEY18  | BY4741, <i>yap1Δ::kanMX4 ahp1Δ::SpHIS5</i>               | This study |
| FEY42  | BY4741, <i>urm1Δ::kanMX4 trx1Δ::SpHIS5</i>               | This study |
| FEY43  | BY4741, <i>trx2Δ::kanMX4 urm1Δ::KIURA3</i>               | This study |
| FEY47  | BY4741, <i>urm1Δ::kanMX4 trx1Δ::SpHIS5 trx2Δ::KILEU2</i> | This study |
| RK101  | BY4741, <i>urm1Δ::kanMX4 trr1Δ::SpHIS5</i>               | This study |
| RK53   | BY4741, <i>yap1Δ::kanMX4 urm1Δ::SpHIS5</i>               | This study |

**Supplemental Table S2. Primers used in this study.**

| Primer          | Sequence (5'-3')                                                             | Application |
|-----------------|------------------------------------------------------------------------------|-------------|
| AHP1_C31S_FW    | CAGTGAATCTAGTAAGATGCCACAAAC                                                  | AHP1 SM *   |
| AHP1_C31S_RV    | GTTTGTGGCATCTTACTAGATTCCTG                                                   | AHP1 SM     |
| AHP1_C62S_FW    | CTTTCTCCCAACCAGTACTGTCAGCCATATTC                                             | AHP1 SM     |
| AHP1_C62S_RV    | GAATATGGCTGACAGTACTGGTTGGGGAGAAA                                             | AHP1 SM     |
| AHP1_C120S_FW   | CGACCCAGGCAGTGCTTTCACCAAATC                                                  | AHP1 SM     |
| AHP1_C120S_RV   | GATTTGGTGAAAGCACTGCCTGGGTCG                                                  | AHP1 SM     |
| AHP1_F58A_FW    | CCGGTGCTCCAGCTGCTGCTTCCCAACCTGTACTG                                          | AHP1 SM     |
| AHP1_F58A_RV    | CAGTACAGGTTGGGGAAGCAGCAGCTGGAGCACCGG                                         | AHP1 SM     |
| AHP1_F95A_FW    | GTTACTGTTGACAACCCGGCTGCTAACCAAGCGTGGGC                                       | AHP1 SM     |
| AHP1_F95A_RV    | GCCCACGCTTGTTAGCAGCCGGTGTCAACAGTAAC                                          | AHP1 SM     |
| AHP1_K32R_FW    | CAGTGAATCTTGTAGGATGCCACAAAC                                                  | AHP1 SM     |
| AHP1_K32R_RV    | GTTTGTGGCATCCTACAAGATTCCTG                                                   | AHP1 SM     |
| AHP1_K156R_FW   | CTTACGCTGCCAGGGAAACCAACC                                                     | AHP1 SM     |
| AHP1_K156R_RV   | GGTTGGTTTCCCTGGCAGCGTAAG                                                     | AHP1 SM     |
| AHP1_FW_HindIII | GGGAAGCTTCCTTGGCCTCGATCTATTGC                                                | Sequencing  |
| AHP1_RV_EcoRI   | GGGGAATTCCTGCTCCAACCTACTCTGTC                                                | Sequencing  |
| KO_URM1_FW      | CAATACTGATTTCTGATACTAAAACGAGATAGGTTAATAGCA<br>AAATCGGGCAGCTGAAGCTTCGTACGC    | URM1 KO **  |
| KO_URM1_RV      | CTTTATATATATATATGTAGCTGCTTCTTAAAAATTATTTGCT<br>GCTATTTGCATAGGCCACTAGTGGATCTG | URM1 KO     |
| AHP1KOF         | ATTTCAACAAACCAGAACAACACAAGTACTACCAATAACCAC<br>AACAAAACCAGCTGAAGCTTCGTACGC    | AHP1 KO     |
| AHP1KOR         | TTTTGAATTTTTTTTATATAAACATGGTTTTATTGTCTATTACA<br>TAGCATGCATAGGCCACTAGTGGATCTG | AHP1 KO     |
| KO_TRX1_FW      | CCCTGAAACTGCATTAGTGAATAGAAGACTAGACACCTCG<br>ATACAAATACAGCTGAAGCTTCGTACGC     | TRX1 KO     |
| KO_TRX1_RV      | TATATAACAAACACAGTATAGAAACACAATATATCGGTCATT<br>GGGTGAGTGCATAGGCCACTAGTGGATCTG | TRX1 KO     |
| KO_TRX2_FW      | CACGCACACATACACGAGAGTCTACGATATCTTTAAATAACA<br>CATCAATACAGCTGAAGCTTCGTACGC    | TRX2 KO     |
| KO_TRX2_RV      | TTTAAACTGGTAAACATGATGTACTTTACGTAGCGTTAATAT<br>ACCGGCAAGCATAGGCCACTAGTGGATCTG | TRX2 KO     |
| KO_TRR1_FW      | CTATACAGCAAATAGCGAACAGTACGAAAGTAAACATCATAT<br>TATCAATACAGCTGAAGCTTCGTACGC    | TRR1 KO     |
| KO_TRR1_RV      | GATAAGTATACAAAAATTTGAGTGTATCTATTTTATAATGGAA<br>AATTCATGCATAGGCCACTAGTGGATCTG | TRR1 KO     |

\* SM: site-directed mutagenesis \*\* KO: gene knock-out generation

**Supplemental Table S3. Plasmids used in this study.**

| Plasmid   | Description                                                                                                | Reference  |
|-----------|------------------------------------------------------------------------------------------------------------|------------|
| pRS426    | 2 $\mu$ ori, <i>ScURA3</i>                                                                                 | [81]       |
| YCplac33  | <i>ARS1-CEN4</i> , <i>ScURA3</i>                                                                           | [80]       |
| YCplac111 | <i>ARS1-CEN4</i> , <i>ScLEU2</i>                                                                           | [80]       |
| pHA-URM1  | <i>HA-URM1</i> cloned into pRS426 <sub><i>Sma</i>I</sub>                                                   | [17]       |
| pCB45     | $\rho$ <sub><i>GAL1-TAP-URM1</i></sub> cloned into YCplac33 <sub><i>Hind</i>III/<i>Sal</i>I</sub>          | [20]       |
| pAJ46     | $\rho$ <sub><i>ADH1-(HA)3-hURM1-TCYC1</i></sub> cloned into YCplac33 <sub><i>Hind</i>III/<i>Sal</i>I</sub> | [20]       |
| pAJ31     | <i>AHP1</i> cloned into YCplac111 <sub><i>Hind</i>III/<i>Eco</i>RI</sub>                                   | This study |
| pAJ33     | <i>C31S</i> in pAJ31 by SM                                                                                 | This study |
| pAJ35     | <i>K32R</i> in pAJ31 by SM                                                                                 | This study |
| pAJ39     | <i>C62S</i> in pAJ31 by SM                                                                                 | This study |
| pAJ55     | <i>K156R</i> in pAJ31 by SM                                                                                | This study |
| pAJ57     | <i>K32, 156R</i> in pAJ31 by SM                                                                            | This study |
| pAJ67     | <i>C31, 62S</i> in pAJ31 by SM                                                                             | This study |
| pLK1      | <i>C120S</i> in pAJ31 by SM                                                                                | This study |
| pLK2      | <i>C31, 120S</i> in pAJ33 by SM                                                                            | This study |
| pLK3      | <i>C62, 120S</i> in pAJ39 by SM                                                                            | This study |
| pLK90     | <i>C62S</i> in pAJ35 by SM                                                                                 | This study |
| pLK91     | <i>C62S</i> in pAJ55 by SM                                                                                 | This study |
| pLK92     | <i>C31S</i> in pAJ55 by SM                                                                                 | This study |
| pLK93     | <i>C62S</i> in pAJ57 by SM                                                                                 | This study |
| pCiB40    | <i>F58A</i> in pAJ31 by SM                                                                                 | This study |
| pCiB19    | <i>F95A</i> in pAJ31 by SM                                                                                 | This study |
| pCiB39    | <i>F58, 95A</i> in pCiB19 by SM                                                                            | This study |
| pMT173    | ScUrm1-COSH in Intein system                                                                               | [29]       |

**3) Supplemental References**

- [17] K. Furukawa, N. Mizushima, T. Noda, and Y. Ohsumi, A protein conjugation system in yeast with homology to biosynthetic enzyme reaction of prokaryotes, *J Biol Chem* 275 (2000) 7462-7465.
- [20] A. Jüdes, F. Ebert, C. Bar, K.L. Thuring, A. Harrer, R. Klassen, M. Helm, M.J. Stark, and R. Schaffrath, Urmylation and tRNA thiolation functions of ubiquitin-like Uba4.Urm1 systems are conserved from yeast to man, *FEBS Lett* 589 (2015) 904-909.
- [29] M. Termathe and S.A. Leidel, The Uba4 domain interplay is mediated via a thioester that is critical for tRNA thiolation through Urm1 thiocarboxylation, *Nucleic Acids Res* 46 (2018) 5171-5181.
- [80] R.D. Gietz and A. Sugino, New yeast-*Escherichia coli* shuttle vectors constructed with in vitro mutagenized yeast genes lacking six-base pair restriction sites, *Gene* 74 (1988) 527-534.
- [81] T.W. Christianson, R.S. Sikorski, M. Dante, J.H. Shero, and P. Hieter, Multifunctional yeast high-copy-number shuttle vectors, *Gene* 110 (1992) 119-122.
